# Supplementary material
Source: publisher site journal article supplement (https://www.dovepress.com/article/355801)
Supplement: Supplementary file 1 [file get_supplementary_file.php]

**Supplementary Table 1. Domains of the BRIEF-MPI**

| **Domain** | **Source** | **Item** | **Score** |
| --- | --- | --- | --- |
| **Basic Activities of Daily Living** | **ADL** | Is the patient able to eat completely independently? | 0=No - 1=yes |
| Is the patient able to get dressed by him/herself completely independently? | 0=No - 1=yes |
| Does the patient exercise complete self- control over urination and defecation? | 0=No - 1=yes |
| **Instrumental Activities of Daily Living** | **IADL** | Is he/she able to phone? | 0=No - 1=yes |
| Is he/she responsible for taking medication in correct dosages at correct time? | 0=No - 1=yes |
| Is he/she able to take care of all shopping needs independently? | 0=No - 1=yes |
| **Mobility** | **MPI-InChianti** | Is he/she able to get in and out of bed/chair alone? | 0=No - 1=yes |
| Is he/she able to walk at least ten feet without any assistance (with/without walking aids)? | 0=No - 1=yes |
| Is he/she able to go up and down stairs without assistance? | 0=No - 1=yes |
| **Cognitive status** | **SPMSQ** | What are the date, month, and year? | 0=correct answer - 1=error |
| How old are you? | 0=correct answer - 1=error |
| Can you count backward from 20 by 3’s? | 0=correct answer - 1=error |
| **Nutrition** | **MNA mod.** | BMI <21 or ≥ 30 | 0=No - 1=yes |
| Has food intake declined over the past 3 months due to loss of appetite, digestive problems, chewing or swallowing difficulties? | 0=No - 1=yes |
| Weight loss > 3 kg in the last 3 months | 0=No - 1=yes |
| **Comorbidity** | **CIRS**  **Selfy-MPI** | Number of diseases requiring chronic therapies | 0-(13) |
| **Medications in chronic therapy** | **History** | Number of drugs (active substances) | from 0 to n. |
| **Co-habitation** | **MPI** | With family, institution, alone |  |

*Abbreviations*: ADL= Activities of Daily Living; CIRS= Cumulative Illness Rating Scale; IADL= Instrumental Activities of Daily Living; MNA-SF= Mini Nutritional Assessment Short Form; MPI= Multidimensional Prognostic Index; SPMSQ= Short Portable Mental Status Questionnaire; SELFY-MPI= Self-administered Multidimensional Prognostic Index

**Supplementary Table 2. Categorization of the BRIEF-MPI**

|  | **Score assigned to each domain** | | |
| --- | --- | --- | --- |
| **Domain** | **Low**  **(Value = 0)** | **Moderate**  **(Value = 0.5)** | **High**  **(Value = 1)** |
| **ADL** | 3 | 2 | 1-0 |
| **IADL** | 3 | 2 | 1-0 |
| **MOBILITY** | 3-2 | 1 | 0 |
| **Cognitive status** | 0-1 | 2 | 3 |
| **Nutritional status** | 0 | 1 | 2-3 |
| **Comorbidity** | 0 | 1-2 | ≥3 |
| **Numers of drugs** | 0-3 | 4-6 | ≥7 |
| **Co-habitation** | With family | Institution | Alone |
| **Add up the scores assigned to each domain, and then divide the sum by 8** | | **SCORE BRIEF-MPI** |  |

As for the standard MPI, the BRIEF-MPI is expressed as a continuous value from 0.0 (lowest risk of mortality) to 1.0 (highest risk of mortality). Appropriate validated cut-offs have been calculated to identify three levels of mortality risk as follows:

| **RISK Class** | **Mild**  **(BRIEF-MPI 1)** | **Moderate**  **(BRIEF-MPI 2)** | **Severe**  **(BRIEF-MPI 3)** |
| --- | --- | --- | --- |
| **RANGE** | **0.00 - 0.33** | **0.34-0.66** | **0.67-1.0** |

*Abbreviations*: ADL= Activities of Daily Living; IADL= Instrumental Activities of Daily Living; MPI= Multidimensional Prognostic Index
